# Supplementary material for: Facile preparation of ordered mesoporous MnCo2O4 for low-temperature selective catalytic reduction of NO with NH3
Source: Royal Society of Chemistry journal article supplement (doi:10.1039/c4nr06451h), 2014-12-23
Supplement: c4nr06451h1.pdf [file c4nr06451h1.pdf]

*Electronic Supplementary Information (ESI)*

**Facile Preparation of Ordered Mesoporous MnCo<sub>2</sub>O<sub>4</sub> for  
Low-temperature Selective Catalytic Reduction of NO with  
NH<sub>3</sub>**

**Mingying Qiu<sup>a</sup>, Sihui Zhan<sup>\*a</sup>, Hongbing Yu<sup>\*a</sup>, Dandan Zhu<sup>a</sup> and Shengqiang Wang<sup>a</sup>**

<sup>a</sup> *College of Environmental Science and Engineering, Nankai University, Tianjin300071, P. R. China; Fax: 022-23502756; Tel: 022-23502756; E-mail: sihuizhan@gmail.com*

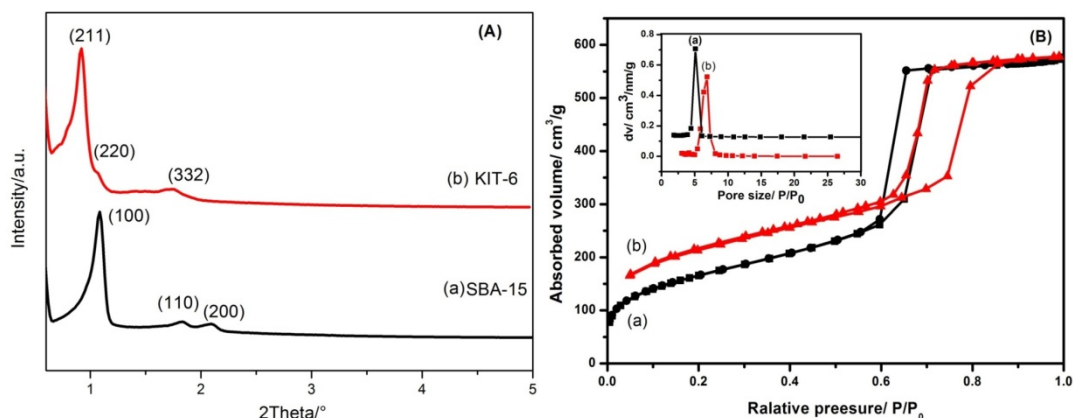

Fig. S1 (A) Low-angle XRD patterns of SBA-15(a) and KIT-6(b).

(B) Nitrogen physisorption isotherms of SBA-15 and KIT-6 (Inset: pore size distribution calculated from desorption branch by BJH method)

Fig. S1 (A) presented the small-angle XRD patterns of KIT-6 and SBA-15. The low-angle XRD reflections confirmed the  $p6mm$  and  $Ia3d$  cubic symmetries of the pore system and the  $N_2$ -physisorption isotherms in Fig. S1 (B) showed the typical type IV isotherms with an H1-type hysteresis loop, indicating the presence of ordered mesopores. The structural parameters were summarized in Table S1.

Table S1. Structural parameters of the template obtained from nitrogen physisorption at  $-196.8\text{ }^\circ\text{C}$

| sample | $S_{\text{BET}}^{[a]}$ [ $\text{m}^2\text{g}^{-1}$ ] | $D_p^{[b]}$ [nm] | $V_p^{[c]}$ [ $\text{cm}^3\text{g}^{-1}$ ] |
|--------|------------------------------------------------------|------------------|--------------------------------------------|
| SBA-15 | 603                                                  | 5.1              | 0.63                                       |
| KIT-6  | 730                                                  | 6.9              | 0.52                                       |

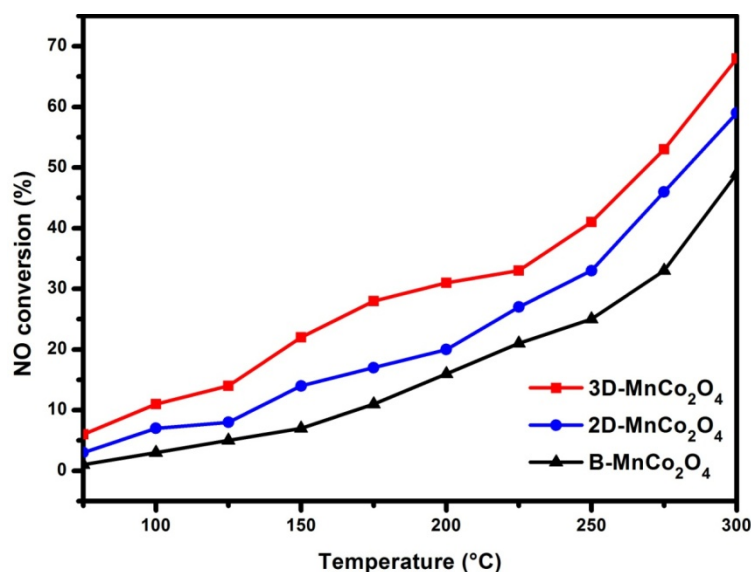

**Fig. S2.** NO conversion in separate NO oxidation reaction over 3D-MnCo<sub>2</sub>O<sub>4</sub>, 2D-MnCo<sub>2</sub>O<sub>4</sub> and B-MnCo<sub>2</sub>O<sub>4</sub> at GHSV of 32, 000 h<sup>-1</sup>.

For low temperature NH<sub>3</sub>-SCR, NO oxidation to NO<sub>2</sub> is very important to promote deNO<sub>x</sub> efficiency by accelerating the “fast SCR” process. Separate NO oxidation experiments were carried out and shown in Fig. S4, the B-MnCo<sub>2</sub>O<sub>4</sub> sample showed low NO oxidation activity over the whole temperature range, while the relatively higher NO conversion to NO<sub>2</sub> could be achieved over the 2D-MnCo<sub>2</sub>O<sub>4</sub> sample. Over the 3D-MnCo<sub>2</sub>O<sub>4</sub> catalyst, much higher NO conversion to NO<sub>2</sub> could be obtained than with 2D-MnCo<sub>2</sub>O<sub>4</sub> over the whole temperature range (e.g. 31% vs. 20% at 200 °C), which is consistent with the SCR performance. These results clearly indicate that the enhancement of low temperature SCR activity of 3D-MnCo<sub>2</sub>O<sub>4</sub> catalyst is strongly associated with facilitation of a “fast SCR” process.

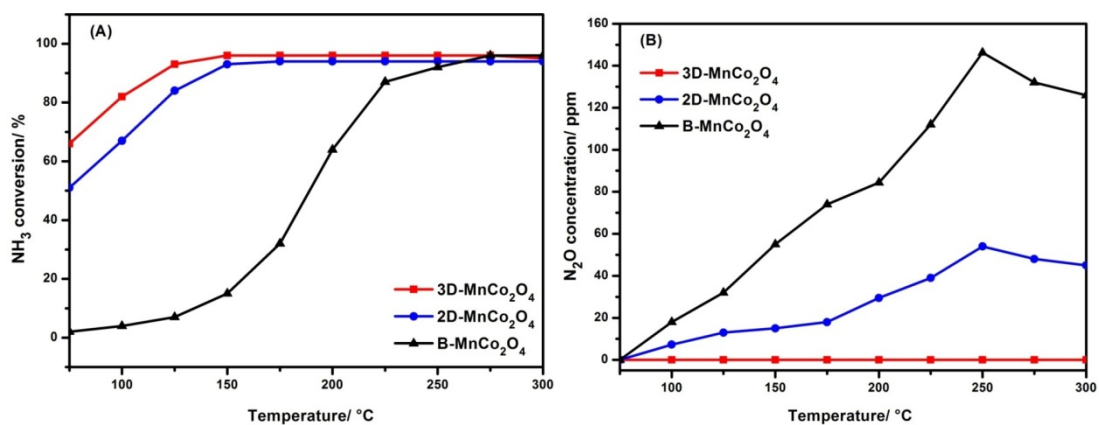

**Fig. S3.** NH<sub>3</sub> conversion in separate NH<sub>3</sub> oxidation reaction (A) and N<sub>2</sub>O concentration (B) over 3D-MnCo<sub>2</sub>O<sub>4</sub>, 2D-MnCo<sub>2</sub>O<sub>4</sub> and B-MnCo<sub>2</sub>O<sub>4</sub> at GHSV of 32, 000 h<sup>-1</sup>.
